# Supplementary material for: Peptostreptococcus anaerobius mediates anti-PD1 therapy resistance and exacerbates colorectal cancer via myeloid-derived suppressor cells in mice
Source: PubMed Central journal article supplement (PMC11153135; doi:10.1038/s41564-024-01695-w), 2024-05-15

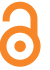

---

# ***Peptostreptococcus anaerobius* mediates anti-PD1 therapy resistance and exacerbates colorectal cancer via myeloid-derived suppressor cells in mice**

---

In the format provided by the authors and unedited

## Supplementary Table 1 Antibodies used for Western-blot, Immunofluorescence staining and Flow cytometry in this Experiments.

| Antibodies                                             | Source                    | Identifier       | Dilution                         |
|--------------------------------------------------------|---------------------------|------------------|----------------------------------|
| Anti-Integrin alpha 2                                  | abcam                     | ab133557         | 1:1000                           |
| Anti-Integrin beta 1                                   | abcam                     | ab179471         | 1:1000                           |
| Anti-NF-κB p65 (D14E12)                                | cell signaling technology | 8242S            | 1:1000                           |
| Anti-Phospho-NF-κB p65 (Ser536)                        | cell signaling technology | 3033S            | 1:1000                           |
| Anti-Beta-Actin (13E5)                                 | cell signaling technology | 4970S            | 1:1000                           |
| Anti-slamf4 (D5J9D)                                    | cell signaling technology | 54560            | 1:1000 (wb)<br>1:100 (pull down) |
| Anti-CD11b                                             | abcam                     | ab133357         | 1:200                            |
| Alexa Fluor 555 Donkey anti-Mouse IgG (H+L)            | thermofisher              | A-31570          | 1:500                            |
| Alexa Fluor® 488 AffiniPure Goat Anti-Rabbit IgG (H+L) | Jackson Immuno            | 111-545-003 (X2) | 1:500                            |
| normal mouse IgG                                       | Santa Cruz                | sc-2025          | 1:200                            |
| Brilliant Violet 605 anti-mouse CD45                   | biolegend                 | 103140           | 1:100                            |
| Brilliant Violet 711 anti-mouse CD46                   | biolegend                 | 103147           | 1:100                            |
| FITC anti-mouse CD3                                    | eBioscience               | 11-0031-85       | 1:100                            |
| PE anti-mouse CD3                                      | biolegend                 | 100206           | 1:100                            |
| FITC anti-mouse CD4                                    | biolegend                 | 100510           | 1:100                            |
| PE-Cyanine5 anti-mouse CD4                             | biolegend                 | 100409           | 1:100                            |
| Brilliant Violet 421 anti-mouse CD8                    | biolegend                 | 100738           | 1:100                            |
| FITC anti-mouse IFNγ                                   | biolegend                 | 505806           | 1:100                            |
| PE-Cyanine5 anti-mouse TNF-α                           | biolegend                 | 506324           | 1:100                            |
| FITC anti-mouse Gr-1                                   | biolegend                 | 108405           | 1:100                            |
| PE-Cyanine7 anti-mouse ly6g                            | biolegend                 | 127618           | 1:100                            |
| PE-Cyanine7 anti-mouse Granzyme B                      | biolegend                 | 396411           | 1:100                            |
| PE-Cyanine7 anti-mouse Arg1                            | eBioscience               | 25-3697-80       | 1:100                            |
| PI                                                     | eBioscience               | BMS500PI         | 1:100                            |
| Brilliant Violet 421 anti-mouse PD-1 (CD279)           | biolegend                 | 135221           | 1:100                            |
| Brilliant Violet 421 anti-mouse Ly6C                   | biolegend                 | 128032           | 1:100                            |
| purified anti-mouse CD16/32                            | biolegend                 | 101302           | 1:100                            |
| PE anti-mouse iNOS                                     | biolegend                 | 696806           | 1:100                            |
| Alexa Fluor® 594 anti-mouse Ly-6G/Ly-6C (Gr-1)         | biolegend                 | 108448           | 1:50 (IF)<br>1:100 (FC)          |
| PE-Cyanine5 anti-mouse CD11b                           | biolegend                 | 101210           | 1:100                            |
| FITC anti-mouse CD12b                                  | biolegend                 | 101206           | 1:100                            |

## Supplementary Table 2 Chemicals, Recombinant Proteins and Kits used in this Experiments

| Chemicals and kits                    | Sources               | Identifier   |
|---------------------------------------|-----------------------|--------------|
| Azoxymethane                          | Sigma-Aldrich         | A5486        |
| Dextran Sodium Sulfate                | MP Biomedicals        | MFCD00081551 |
| Corning matrigel matrix               | Corning               | 356231       |
| Recombinant mouse GM-CSF              | biolegend             | 576304       |
| Recombinant mouse IL-6                | biolegend             | 575704       |
| CFSE                                  | thermofisher          | C1157        |
| Dnase I, Grade II                     | Roche                 | 10104159001  |
| Collagenase IV                        | Roche                 | 58001        |
| InVivoPlus anti-mouse Ly6G            | Bio XCell             | BP0075-1     |
| InVivoMab anti-mouse PD-1             | Bio XCell             | BE0146       |
| Human Slamf4                          | Abclonal              | RP00167      |
| IC Fixation Buffer 125 mL             | eBiosciences          | 00-8822-49   |
| Permeabilization Buffer 10X           | Invitrogen            | 00-8333-56   |
| RBC Lysis Buffer (10X)                | biolegend             | 420301       |
| Recombinant mouse IL-2                | biolegend             | 575404       |
| Ionomycin                             | STEMCELL Technologies | 73724        |
| phorbol 12-myristate 13-acetate       | abcam                 | ab120297     |
| Human CXCL1 Elisa kit                 | abcam                 | ab190805     |
| Mouse CXCL1 Elisa kit                 | abcam                 | ab216951     |
| Human Chemokine Antibody Array        | abcam                 | ab169812     |
| Mouse MDSC (CD11b+Gr1+) Isolation Kit | STEMCELL Technologies | 19867        |
| Mouse T Cell Isolation Kit            | STEMCELL Technologies | 19851        |

## Supplementary Table 3 Primers used for q-PCR

| Gene             | Oligonucleotides        |
|------------------|-------------------------|
| mouse-b-actin-F  | TGTTACCAACTGGGACGACATG  |
| mouse-b-actin-R  | CTGGATGGCTACGTACATGGCT  |
| mouse-Slamf1-F   | CAGAAATCAGGGCCTCAAGAG   |
| mouse-Slamf1-R   | CACTGGCATAAACTGTGGTGG   |
| mouse-Slamf2-F   | CCCAAGCCTTCCATAGAAATCAA |
| mouse-Slamf2-R   | CCAAGTATAGTCAACATGCTGGT |
| mouse-Slamf3-F   | TCAGGGATGCTAGGGGGTTC    |
| mouse-Slamf3-R   | TTCGCTGACTTTGAGTCTGCC   |
| mouse-Slamf4-F   | CTCGGGGCCATCATTTGTTTC   |
| mouse-Slamf4-R   | GCTAGAAGGGAGCTGAACATCA  |
| mouse-Slamf6-F   | TATGCACAAGTCACTCGTCCA   |
| mouse-Slamf6-R   | GGTTATAGCCGGTAAAGCCAC   |
| mouse-Tlr2-F     | GCAAACGCTGTTCTGCTCAG    |
| mouse-Tlr2-R     | AGGCGTCTCCCTCTATTGTATT  |
| mouse-Tlr4-F     | ATGGCATGGCTTACACCACC    |
| mouse-Tlr4-R     | GAGGCCAATTTTGTCTCCACA   |
| mouse-Tlr5-F     | GCAGGATCATGGCATGTCAAC   |
| mouse-Tlr5-R     | ATCTGGGTGAGGTTACAGCCT   |
| mouse-Tlr6-F     | TGAGCCAAGACAGAAAACCCA   |
| mouse-Tlr6-R     | GGGACATGAGTAAGGTTCTGT   |
| mouse-Tlr9-F     | AATCCCTCATATCCCTGTCCC   |
| mouse-Tlr9-R     | GTTGCCGTCCATGAATAGGAAG  |
| mouse-Cxcl1-F    | CTGGGATTCACCTCAAGAACATC |
| mouse-Cxcl1-R    | CAGGGTCAAGGCAAGCCTC     |
| mouse-Arg1-F     | CTCCAAGCCAAAGTCCTTAGAG  |
| mouse-Arg1-R     | AGGAGCTGTCATTAGGGACATC  |
| mouse-inos-F     | GGGCTGTCACGGAGATCA      |
| mouse-inos-R     | CCATGATGGTCACATTCTGC    |
| P. anaerobius -F | CTGATTTGATGCTTGCATTA    |
| P. anaerobius-R  | AGCCCCGAAGGGAAGGTGTG    |

## Supplementary Table 4 Mass Spectrometry Results of Bands Identified from 50-100kDa fraction from culture supernatant of *P. anaerobius*

| Protein Group | Accession                   | Coverage(%) | Area        | #Unique | #Spec | Mass    | Description                                                                                                             |
|---------------|-----------------------------|-------------|-------------|---------|-------|---------|-------------------------------------------------------------------------------------------------------------------------|
| 1             | A0A379CGB7 A0A379CGB7_9FIRM | 92.98       | 60856443000 | 105     | 2856  | 80.864  | N-acetylmuramoyl-L-alanine amidase LytC<br>OS=Peptostreptococcus anaerobius OX=1261<br>GN=lytC_22 PE=4 SV=1             |
| 10            | A0A379CFM5 A0A379CFM5_9FIRM | 50          | 100711096   | 33      | 46    | 81.972  | N-acetylmuramoyl-L-alanine amidase LytC<br>OS=Peptostreptococcus anaerobius OX=1261<br>GN=lytC_21 PE=4 SV=1             |
| 151           | A0A6N7X0K1 A0A6N7X0K1_9FIRM | 48.12       | 5657323     | 2       | 2     | 14.493  | 30S ribosomal protein S11 OS=Peptostreptococcus anaerobius OX=1261 GN=rpsK PE=3 SV=1                                    |
| 151           | A0A135YUR7 A0A135YUR7_9FIRM | 48.12       | 5657323     | 2       | 2     | 14.479. | 30S ribosomal protein S11 OS=Peptostreptococcus anaerobius OX=1261 GN=rpsK PE=3 SV=1                                    |
| 151           | D3MTE5 D3MTE5_9FIRM         | 48.12       | 5657323     | 2       | 2     | 14.479  | 30S ribosomal protein S11 OS=Peptostreptococcus anaerobius 653-L OX=596329 GN=rpsK PE=3 SV=1                            |
| 23            | A0A379CHV1 A0A379CHV1_9FIRM | 41.11       | 57788176    | 19      | 24    | 67.248  | Uncharacterized peptidase SA1530<br>OS=Peptostreptococcus anaerobius OX=1261<br>GN=NCTC11460_01965 PE=4 SV=1            |
| 28            | A0A379CFM8 A0A379CFM8_9FIRM | 40.31       | 42666476    | 16      | 20    | 62.369  | Pyruvate kinase OS=Peptostreptococcus anaerobius OX=1261 GN=pyk PE=3 SV=1                                               |
| 28            | D3MPK9 D3MPK9_9FIRM         | 40.31       | 42666476    | 16      | 20    | 62.392  | Pyruvate kinase OS=Peptostreptococcus anaerobius 653-L OX=596329 GN=pyk PE=3 SV=1                                       |
| 28            | A0A135YSW5 A0A135YSW5_9FIRM | 40.31       | 42666476    | 16      | 20    | 62.366  | Pyruvate kinase OS=Peptostreptococcus anaerobius OX=1261 GN=HMPREF3195_01071 PE=3 SV=1                                  |
| 2             | D3MU98 D3MU98_9FIRM         | 38.11       | 629723580   | 8       | 951   | 80.903  | Putative cell wall binding repeat 2<br>OS=Peptostreptococcus anaerobius 653-L<br>OX=596329 GN=HMPREF0631_1404 PE=4 SV=1 |
| 7             | A0A379CFB2 A0A379CFB2_9FIRM | 33.3        | 51208652    | 25      | 34    | 120.494 | N-acetylmuramoyl-L-alanine amidase LytC<br>OS=Peptostreptococcus anaerobius OX=1261<br>GN=lytC_20 PE=4 SV=1             |
| 570           | A0A379CEQ2 A0A379CEQ2_9FIRM | 30.99       | 1518149.2   | 1       | 1     | 84.16   | Barstar (Barnase inhibitor) OS=Peptostreptococcus anaerobius OX=1261 GN=NCTC11460_00474 PE=3 SV=1                       |
| 40            | A0A379CF33 A0A379CF33_9FIRM | 24.01       | 23831450    | 11      | 15    | 81.537  | N-acetylmuramoyl-L-alanine amidase LytC<br>OS=Peptostreptococcus anaerobius OX=1261<br>GN=lytC_11 PE=4 SV=1             |
| 43            | A0A379CHG0 A0A379CHG0_9FIRM | 23.21       | 16648673    | 9       | 15    | 71.305  | 85 kDa vitronectin-binding protein<br>OS=Peptostreptococcus anaerobius OX=1261<br>GN=fusA_2 PE=3 SV=1                   |

## Supplementary Table 5 siRNA Used in the Experiments.

| <b>Gene</b> | <b>Species</b> | <b>Company</b>        | <b>Identifier</b> |
|-------------|----------------|-----------------------|-------------------|
| siCXCL1-1   | Human          | Invitrogen            | s6215             |
| siCXCL1-2   | Human          | Invitrogen            | s6216             |
| siCXCL3-1   | Human          | Invitrogen            | s6221             |
| siCXCL3-1   | Human          | Invitrogen            | s6223             |
| siTGA2      | Human          | Invitrogen            | s7573             |
| siTGB1      | Human          | GCACCAGCCCAUUUAGCUATT |                   |

Fig 5a

MDSC Anti-actin

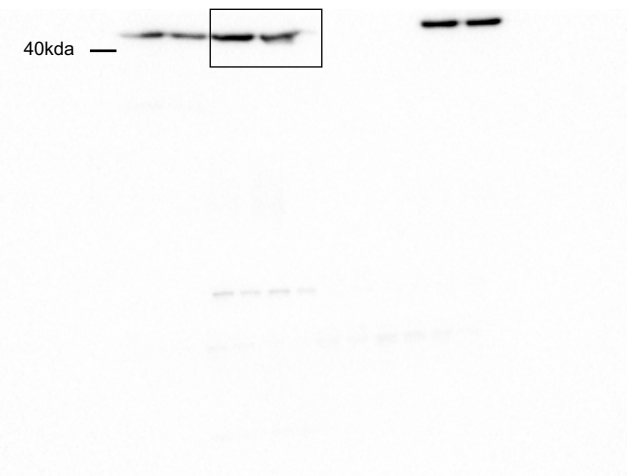

Anti-Slamf4

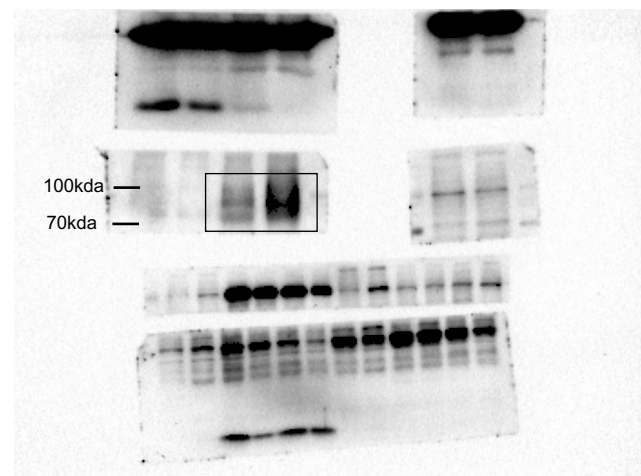

Fig 5f

Anti-GST

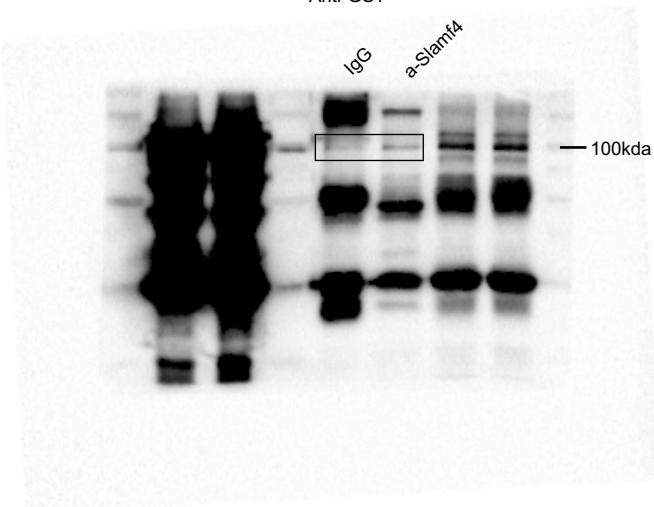

Anti-Slamf4

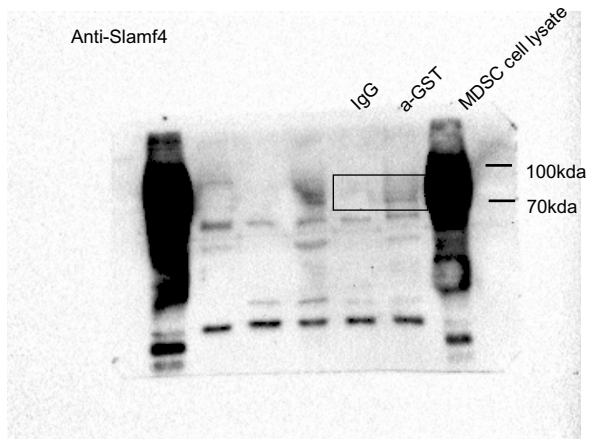

Fig 5f

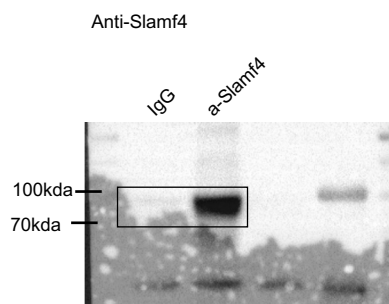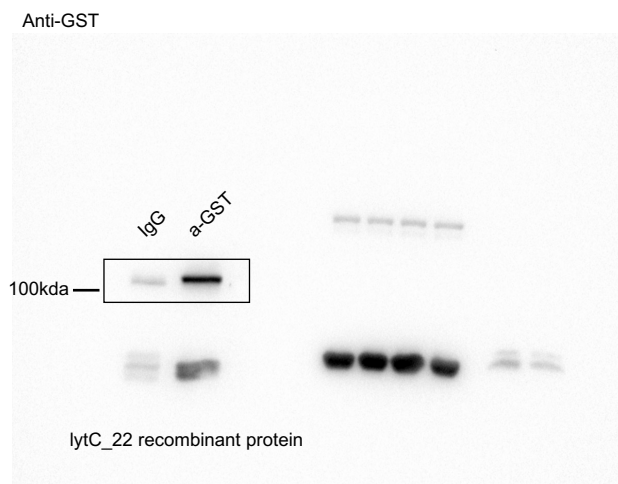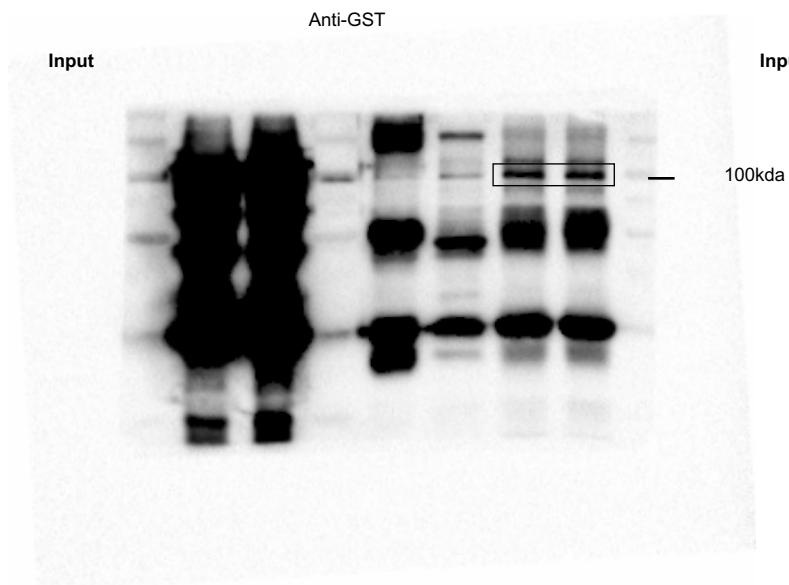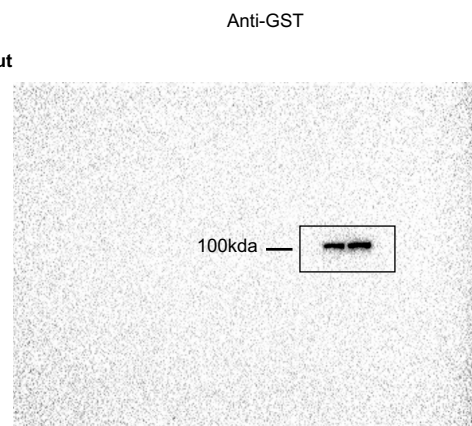



Fig 5f

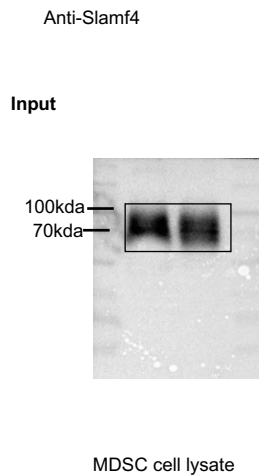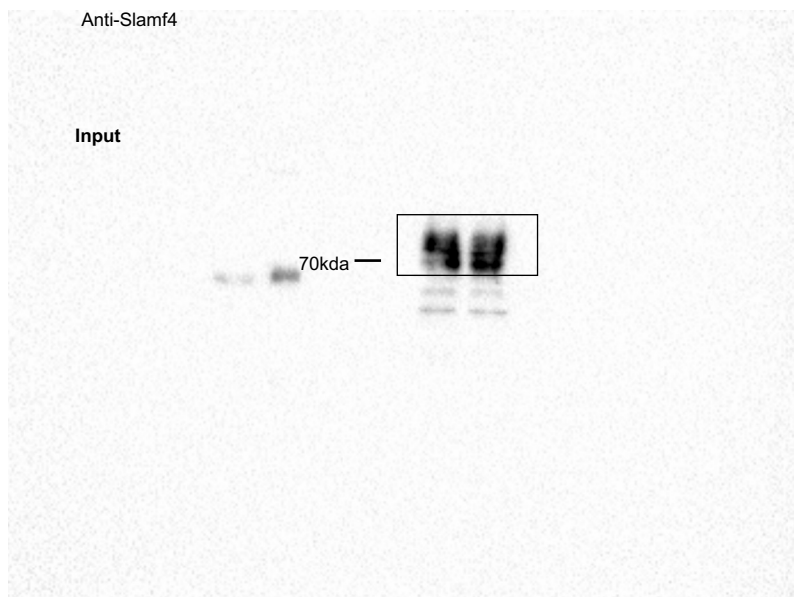

Fig 5g

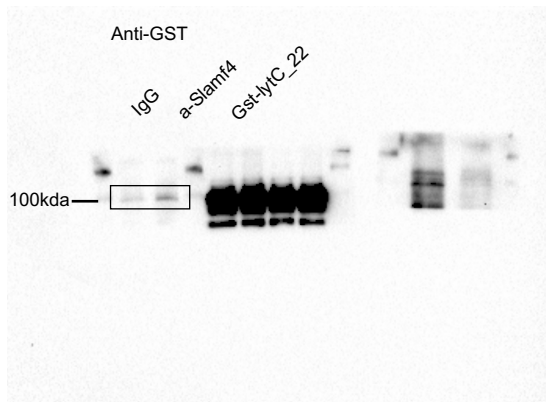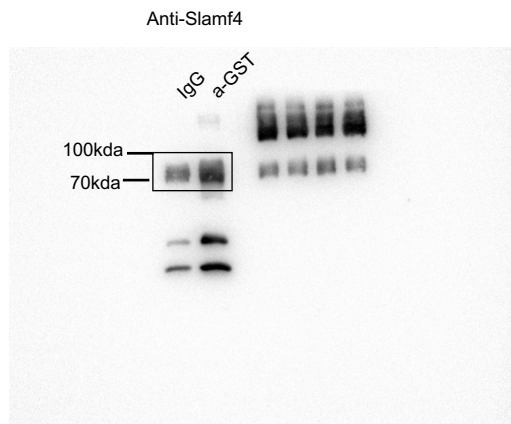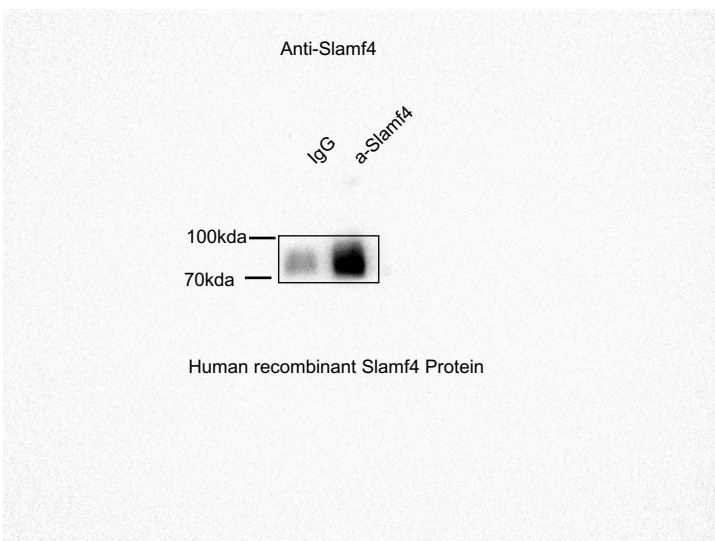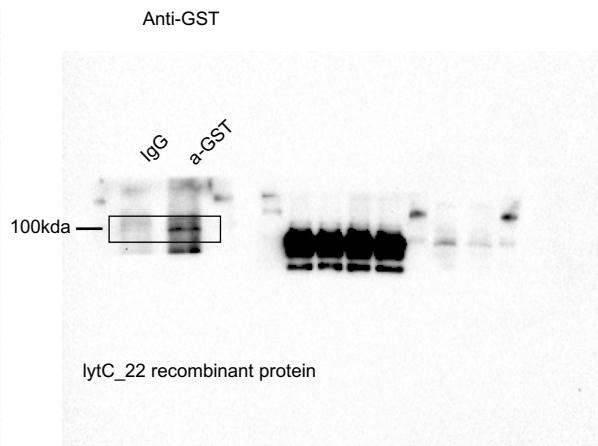

Fig 5g

Input

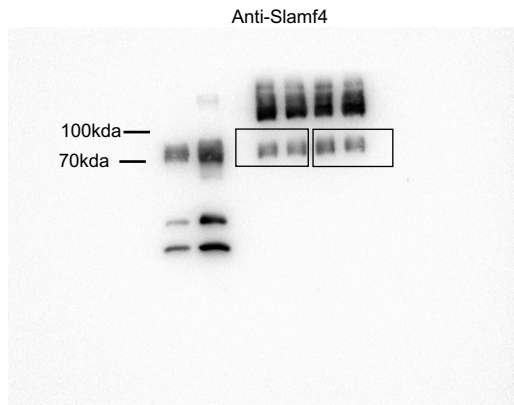

Input

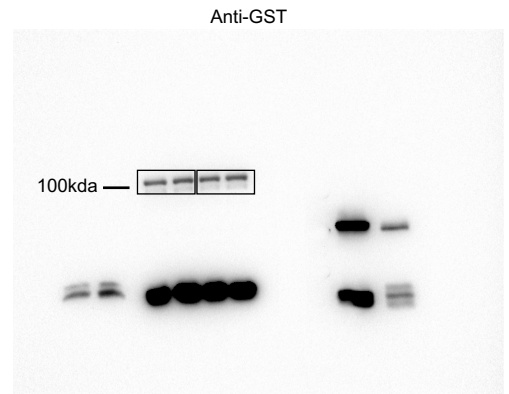

Fig 6b

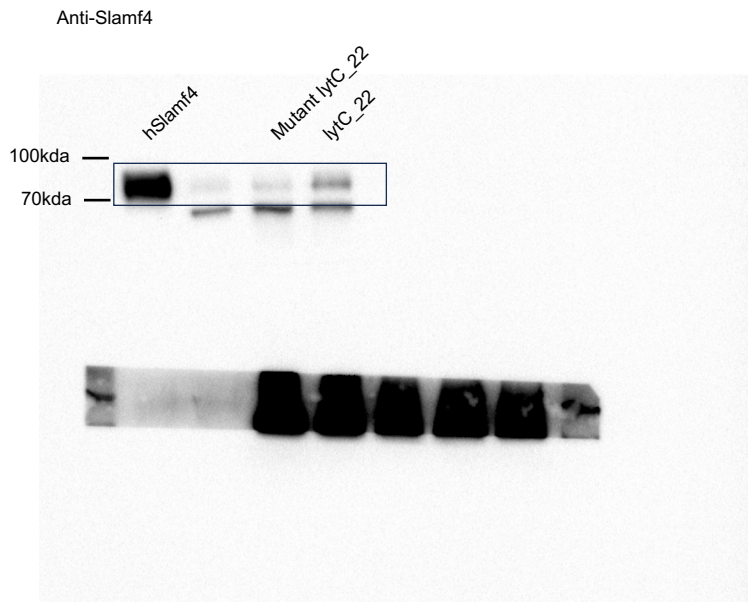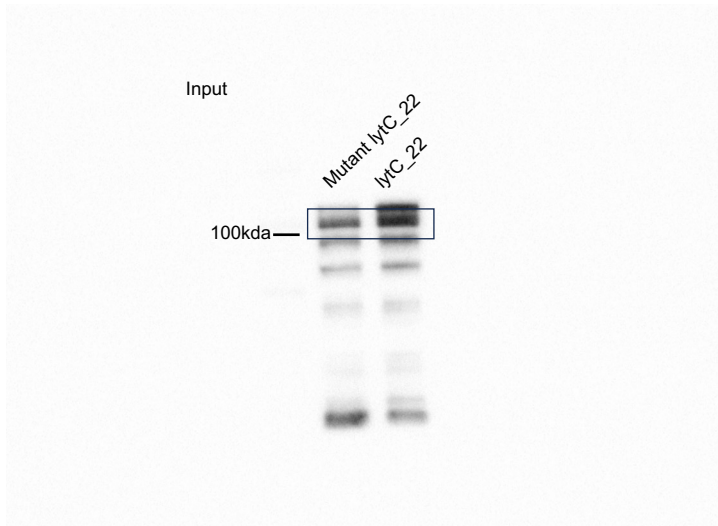

HCT116 Actin

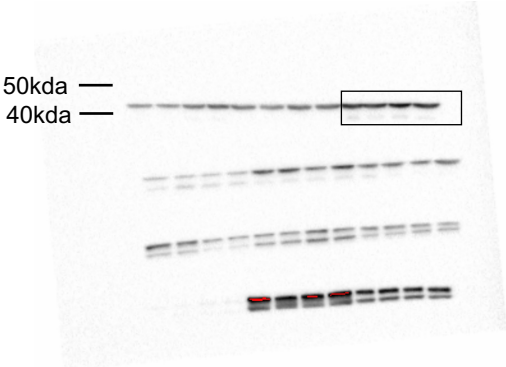

HCT116 NF-KB p65

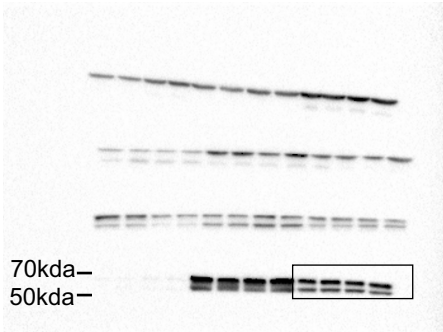

HCT116 p-NF-KB p65

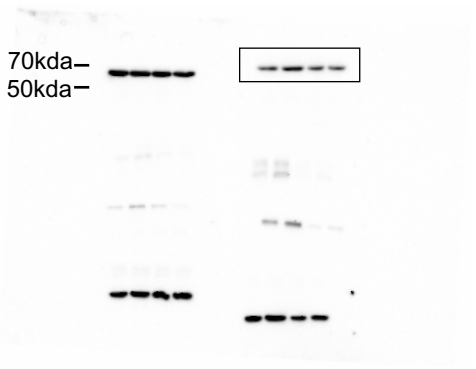

HCT116 Integrin  $\beta$ 1

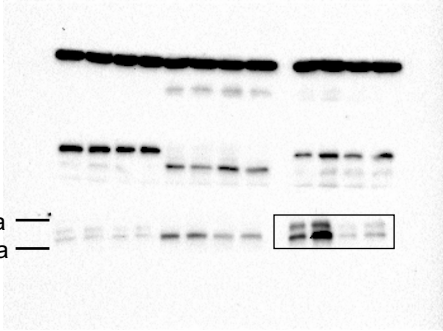

HCT116 Integrin  $\alpha$ 2

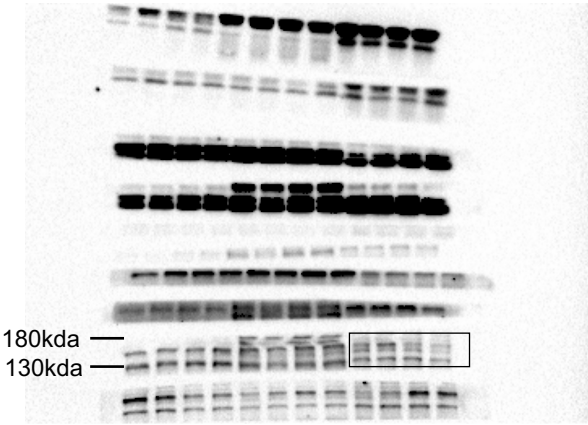

Extended Figure 5a

Caco-2 actin

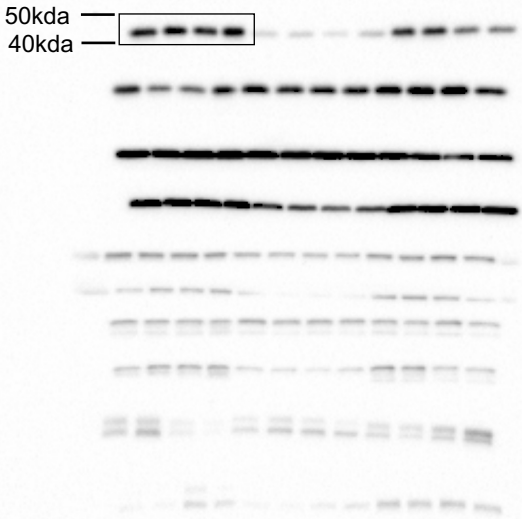

Caco-2 NF-KB p65

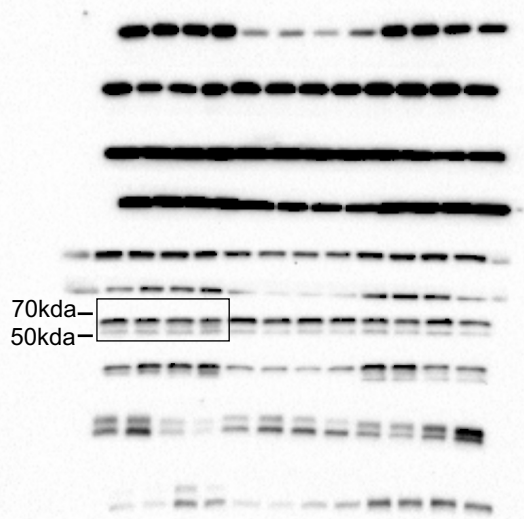

Caco-2 p-NF-KB p65

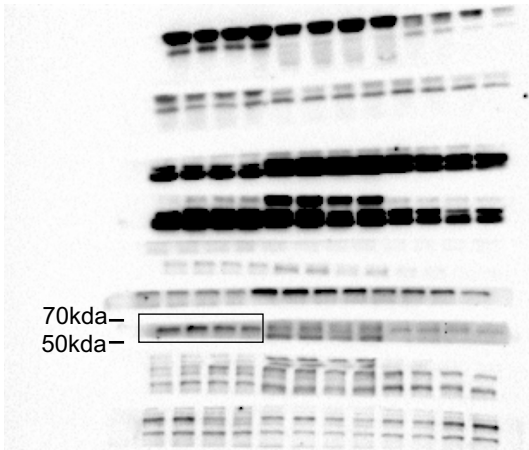

Caco-2 Integrin  $\beta$ 1

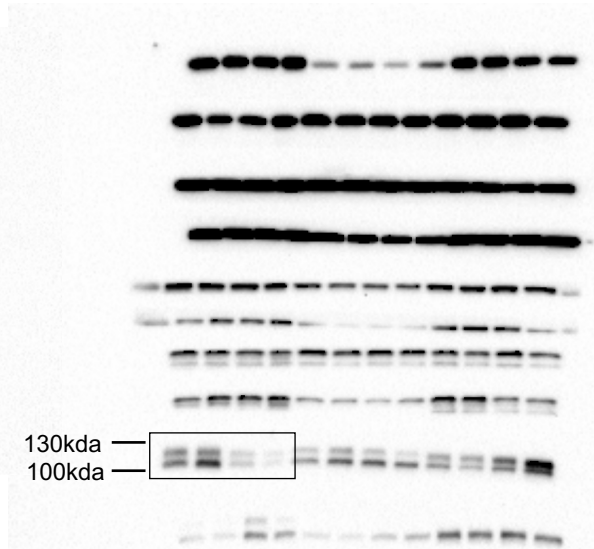

Caco-2 Integrin  $\alpha$ 2

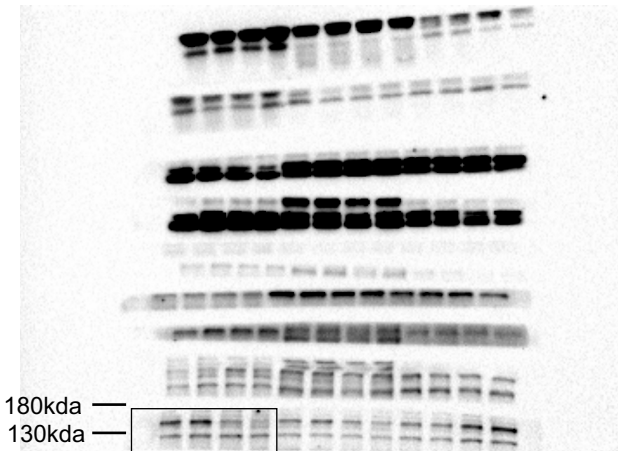

HCT116 actin

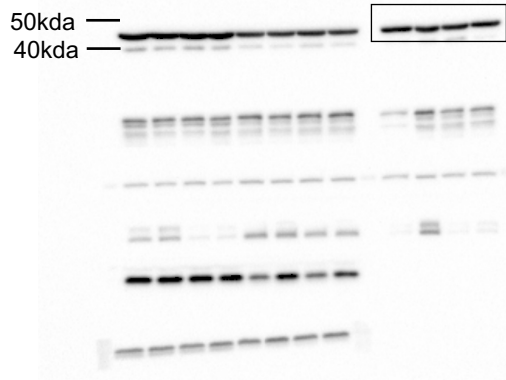

HCT116 NF-KB p65

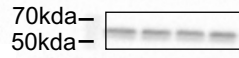

HCT116 p-NF-KB p65

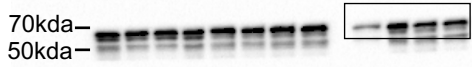

HCT116 Integrin  $\beta$ 1

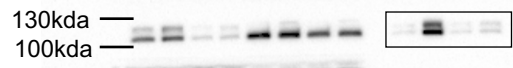

HCT116 Integrin  $\alpha$ 2

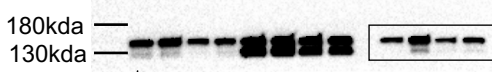

MC38 actin

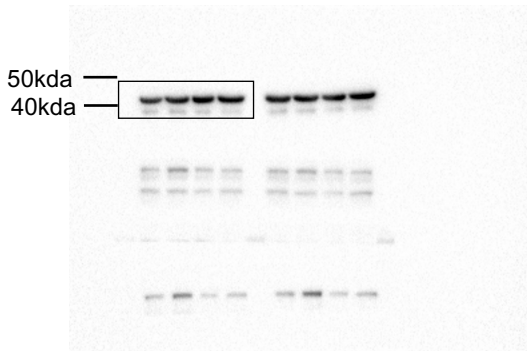

MC38 NF-KB p65

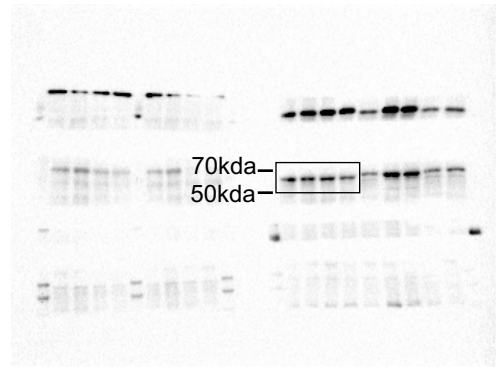

MC38 p-NF-KB p65

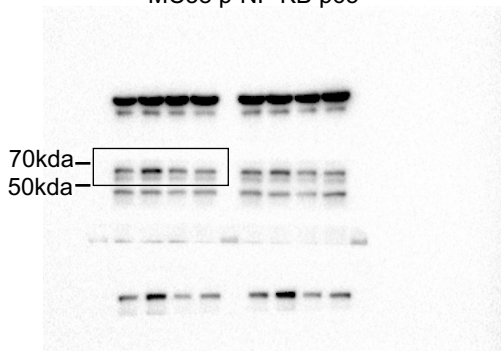

MC38 Integrin  $\beta$ 1

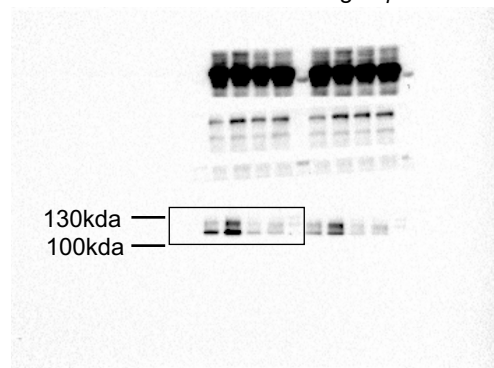

MC38 Integrin  $\alpha$ 2

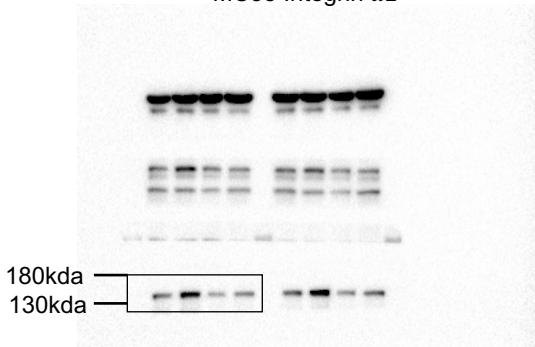



Extended Figure 5c

HCT116 Cyto-Actin

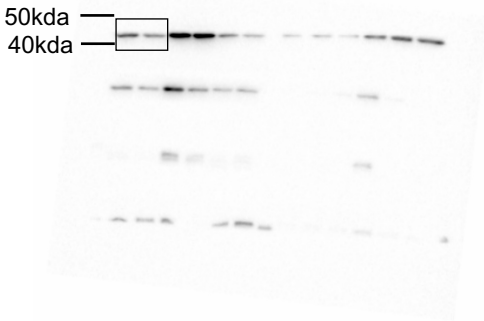

HCT116 Cyto-p-NF-KB p65

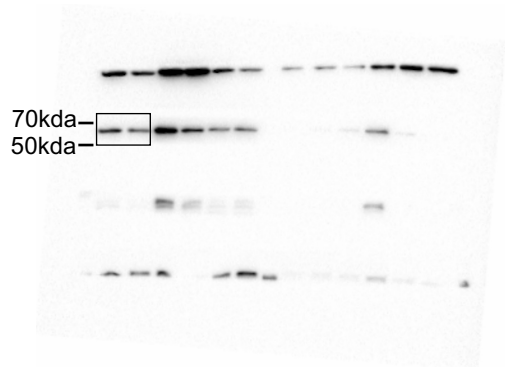

HCT116 Cyto-NF-KB p65

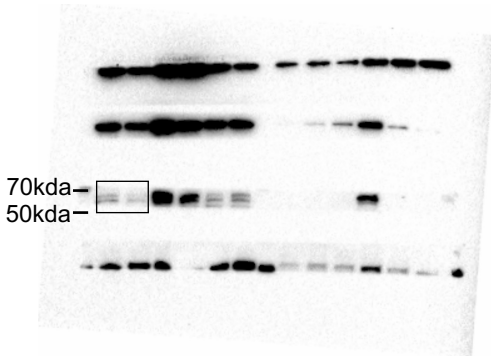

Caco-2 Cyto-Actin

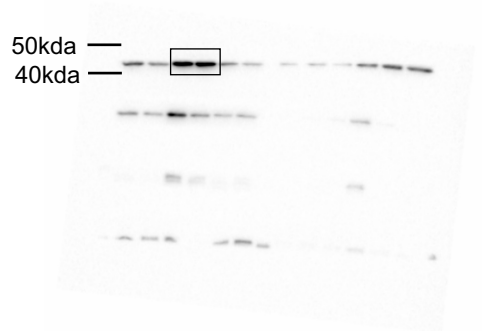

Caco-2 Cyto-p-NF-KB p65

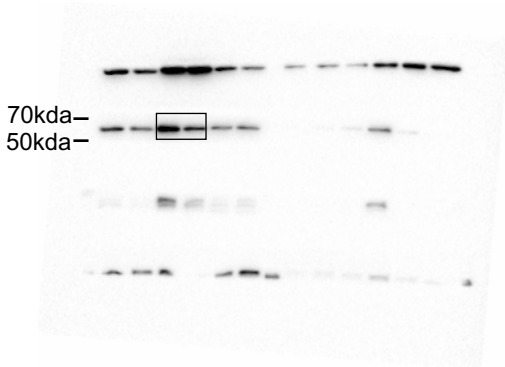

Caco-2 Cyto-NF-KB p65

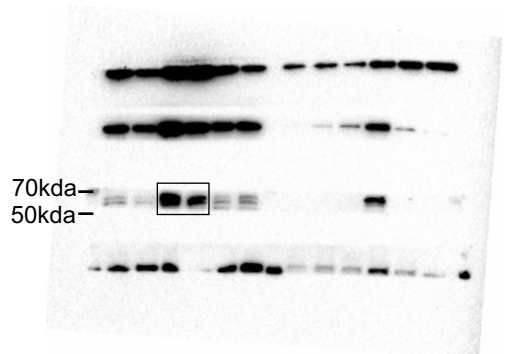

MC38 Cyto-Actin

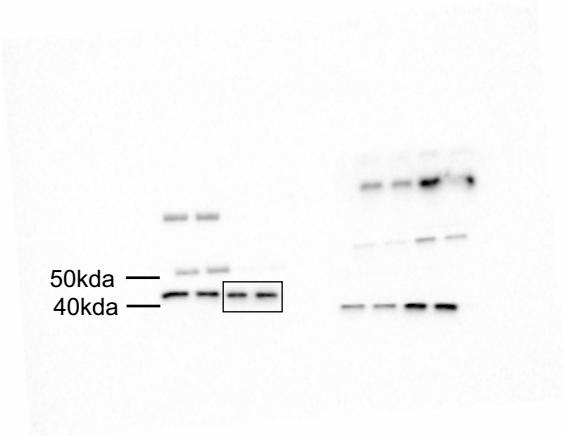

MC38 Cyto-NF-KB p65

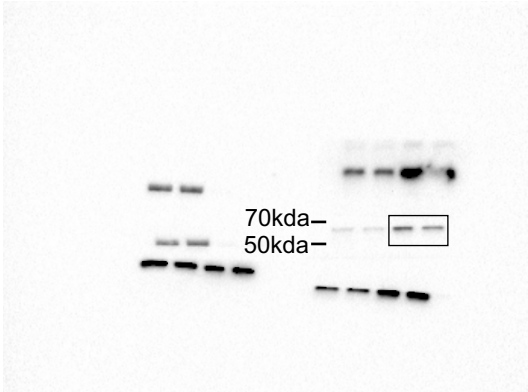

MC38 Cyto-p-NF-KB p65

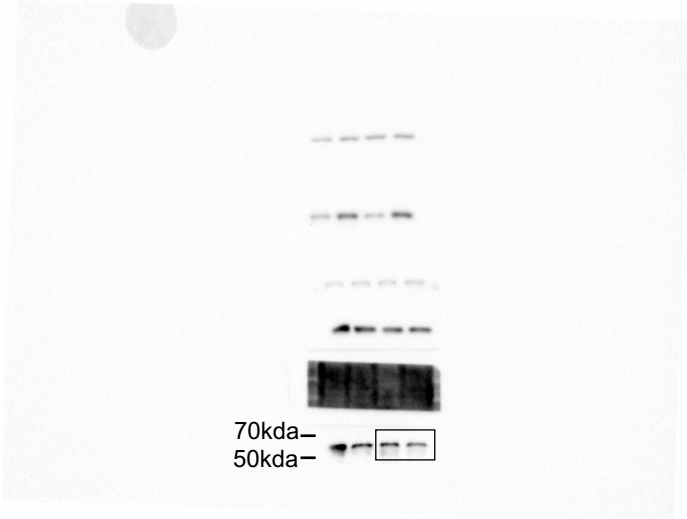

HCT116 nu-Lamin A/C

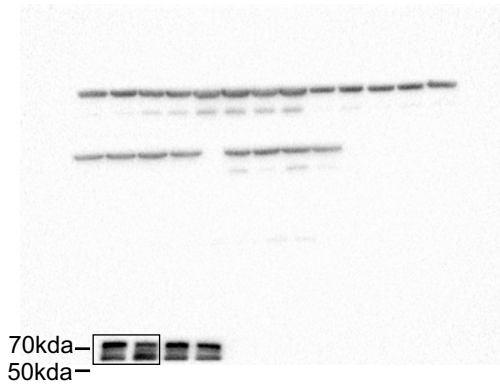

HCT116 nu-NF-KB p65

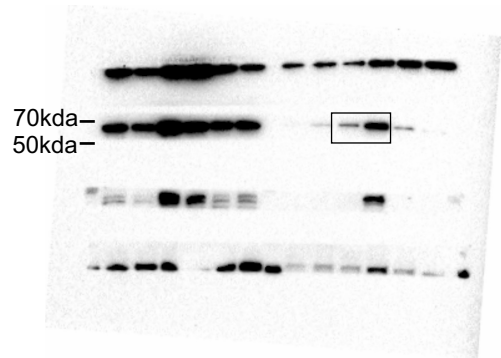

HCT116 nu-p-NF-KB p65

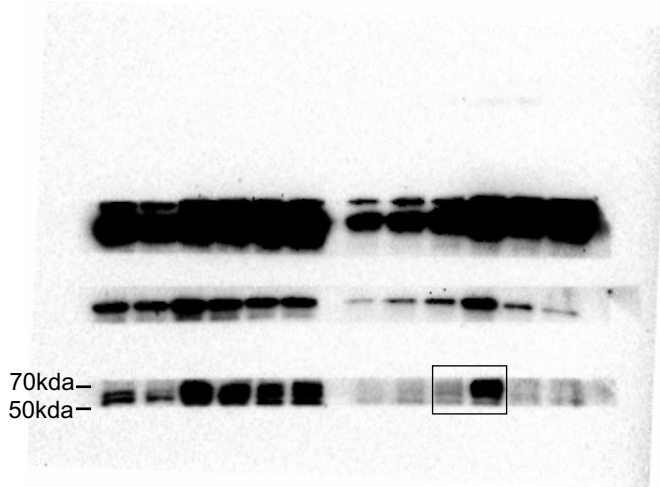

Caco-2 nu-Lamin A/C

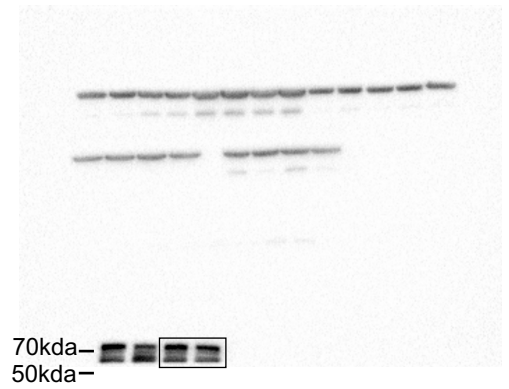

Caco-2 nu-NF-KB p65

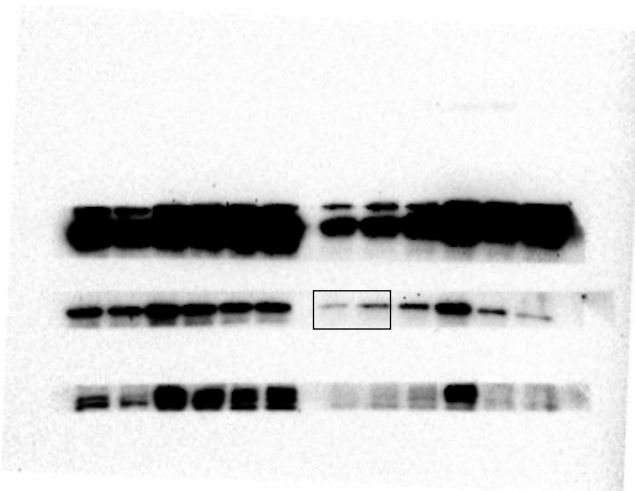

Caco-2 nu-p-NF-KB p65

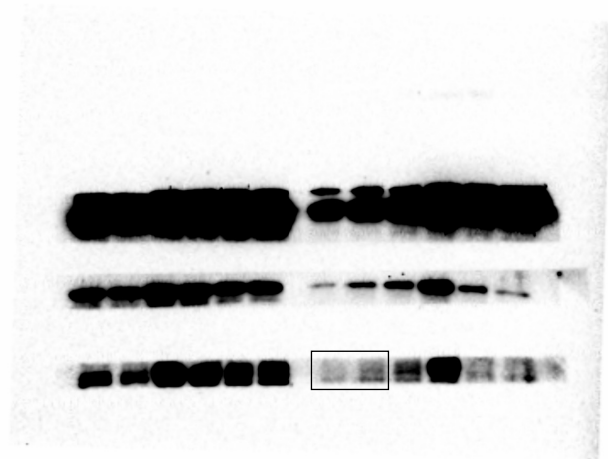

MC38 nu-lamin A/C

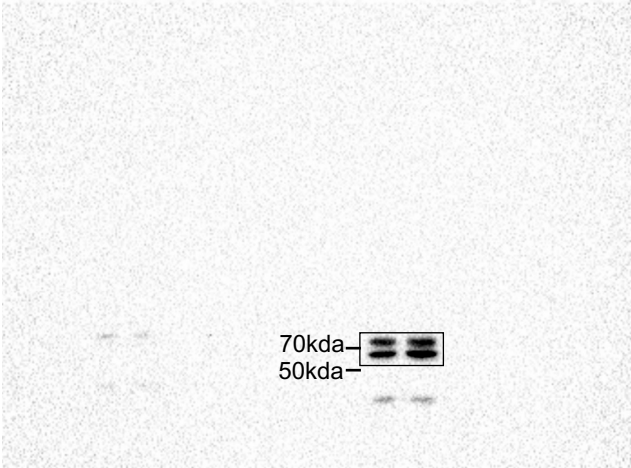

MC38 nu-NF-KB p65

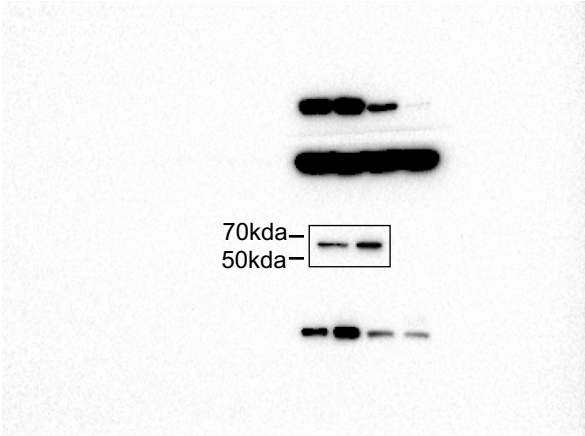

MC38 nu-p-NF-KB p65

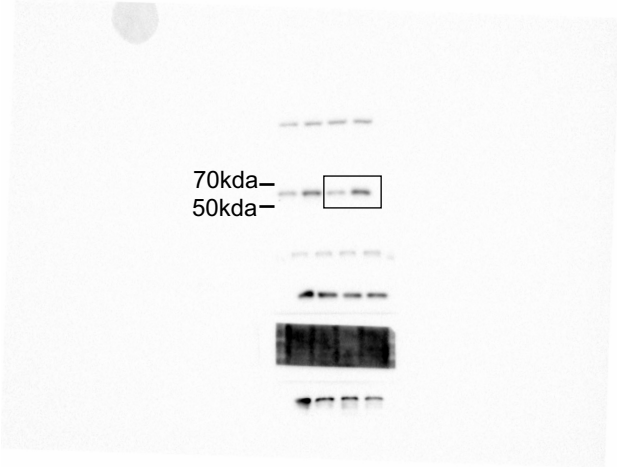

Extended Figure 5d

HCT116 actin

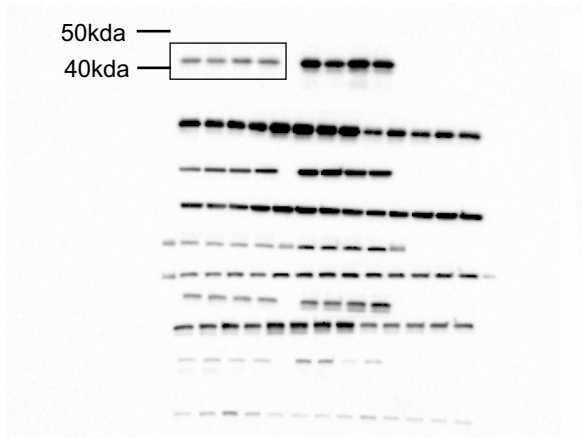

HCT116 NF-KB p65

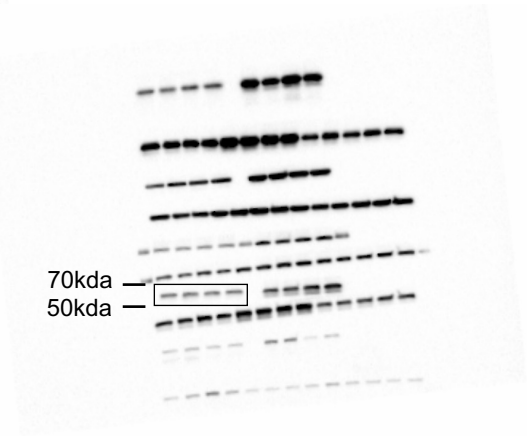

HCT116 p-NF-KB p65

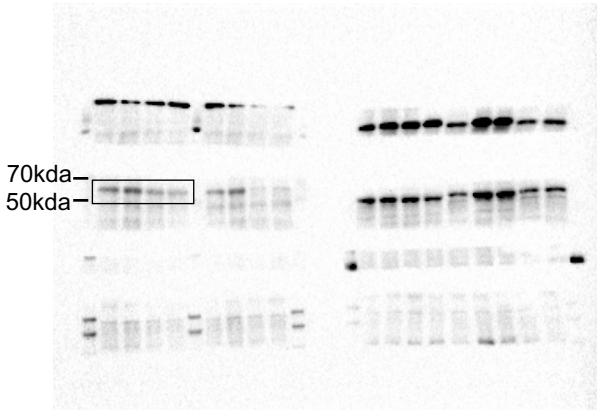

Caco-2 actin

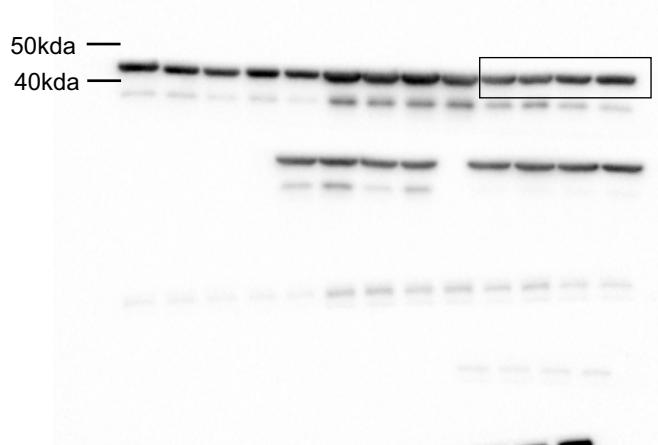

Caco-2 NF-KB p65

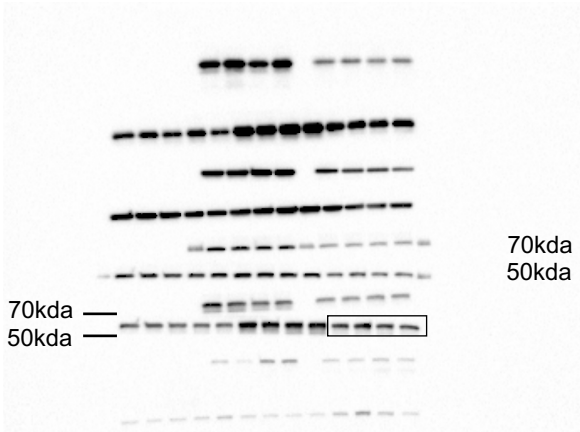

Caco-2 p-NF-KB p65

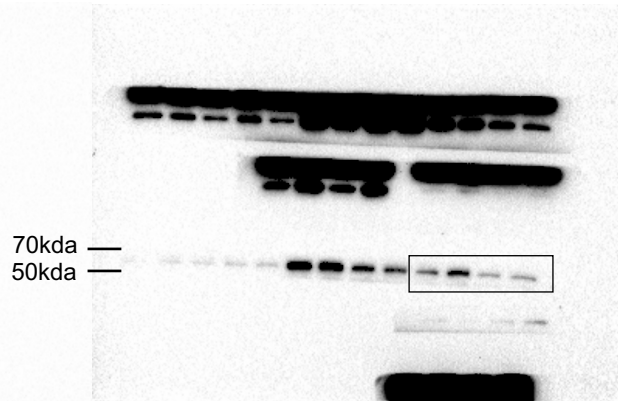

MC38 actin

MC38 NF-KB p65

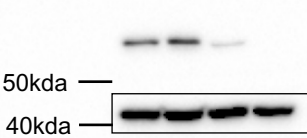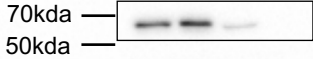

MC38 p-NF-KB p65

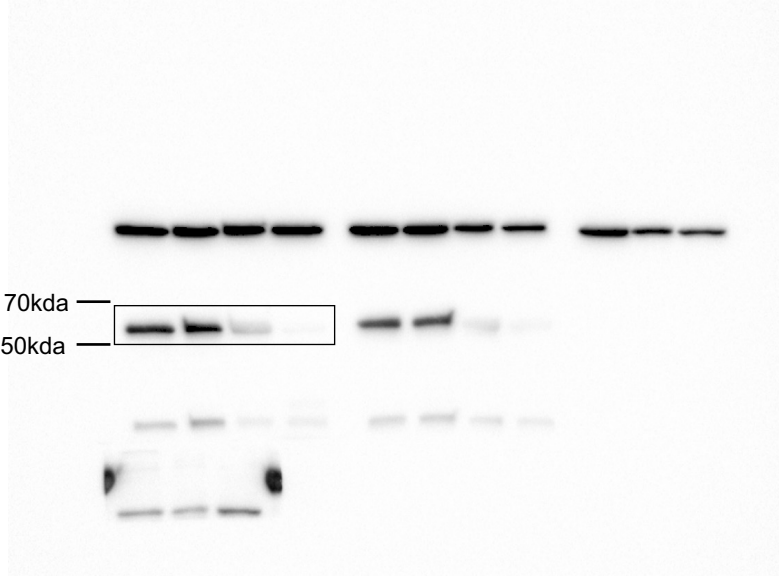

Extended Figure 5k

Actin

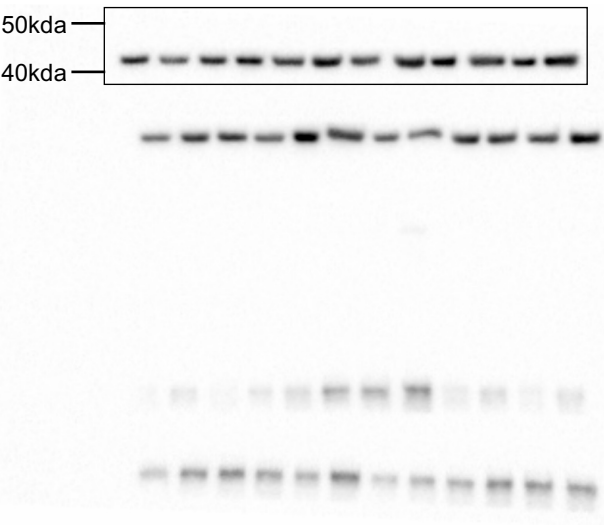

p-NF-KB p65

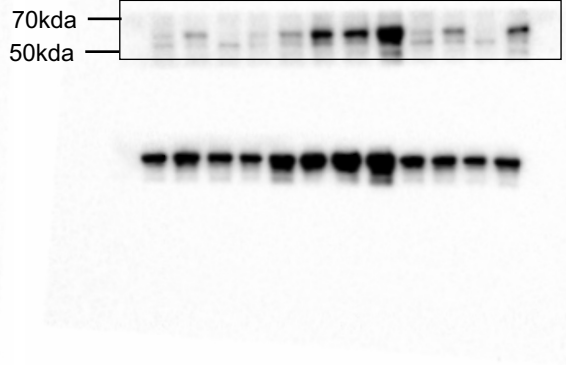

NF-KB p65

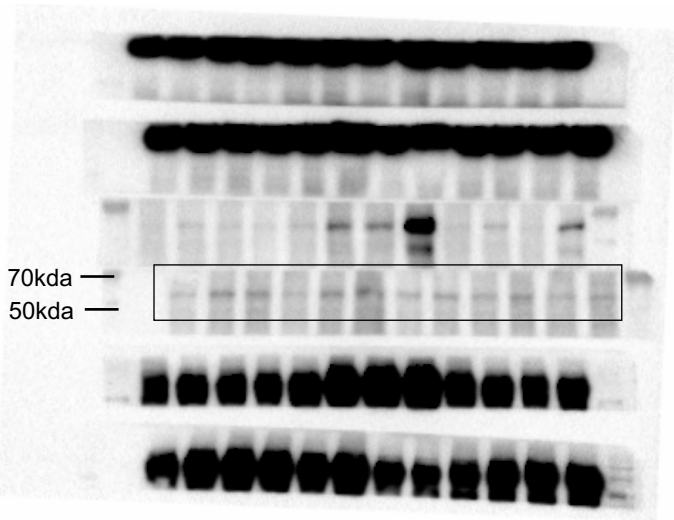

Integrin  $\beta$ 1

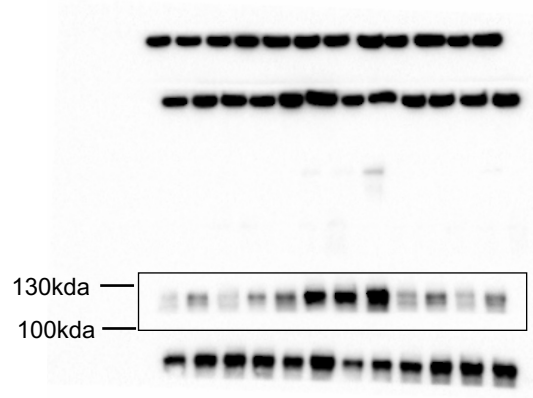

Integrin  $\alpha$ 2

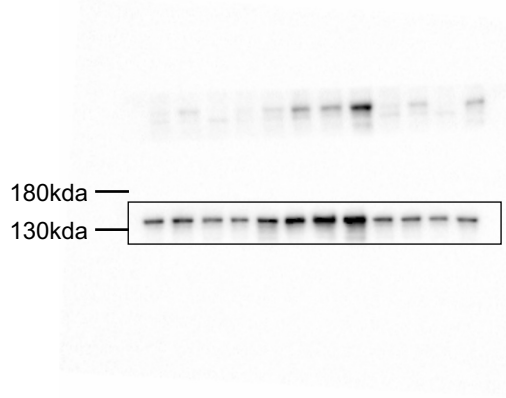

Extended Data Fig 7a

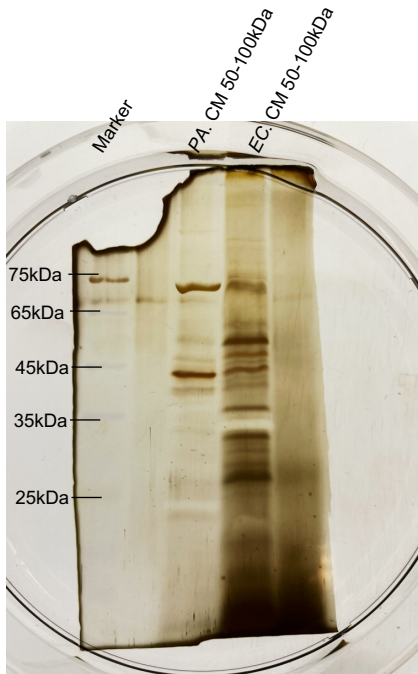



Extended Data Fig 8g

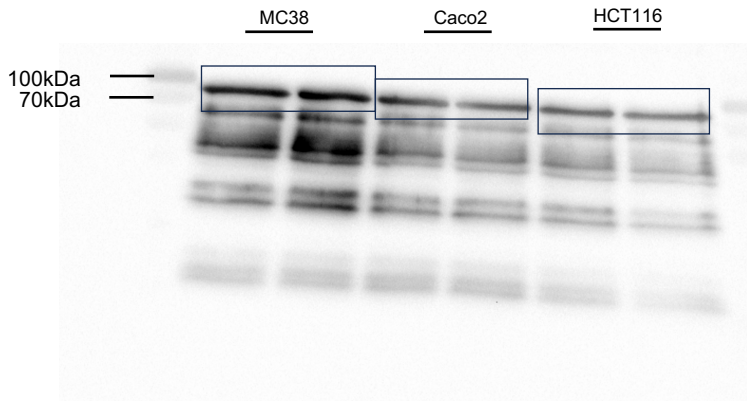

Supplement: 41564_2024_1695_MOESM1_ESM.pdf [file 41564_2024_1695_MOESM1_ESM.pdf]
